# Supplementary material
Source: PubMed Central journal article supplement (PMC1635097)
Supplement: pnas_0607385103_2.pdf [file pnas_0607385103_2.pdf]

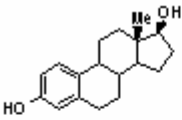

17 $\beta$ -estradiol (E2)-  
agonist

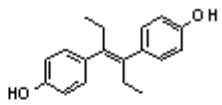

Diethylstilbestrol (DES)  
agonist

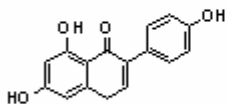

Genistein (Gen)  
partial agonist

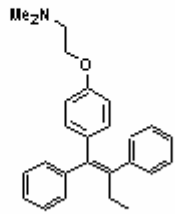

Tamoxifen (Tam)  
antagonist

**Tamoxifen**

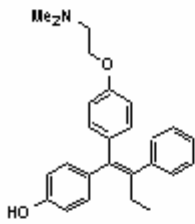

4-Hydroxytamoxifen  
(4-OHT)-antagonist

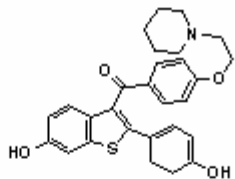

Raloxifene (Ral)  
antagonist

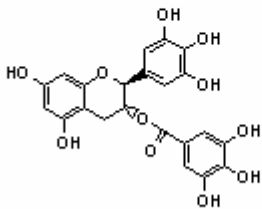

Epigallocatechin (Epi)  
Non-estrogen ligand
