# Supplementary material
Source: PubMed Central journal article supplement (PMC1635097)
Supplement: pnas_0607385103_9.pdf [file pnas_0607385103_9.pdf]

**Table 1. Ligand-induced split RLUC complementation in 293T cells expressing N-RLUC-hER<sub>281-595</sub>-C-RLUC with 20 different single amino acid mutations generated at position 521 of hER**

| Con             | E2              | DES             | OHT             | Ral             | Gen             | ICI             | 521      |
|-----------------|-----------------|-----------------|-----------------|-----------------|-----------------|-----------------|----------|
| 1.537182        | 100             | 92.14092        | 96.78062        | 80.95113        | 1.396585        | 7.002063        | G        |
| <b>3.83679</b>  | <b>6.002425</b> | <b>70.86455</b> | <b>84.1556</b>  | <b>61.90189</b> | <b>2.682569</b> | <b>7.653152</b> | <b>T</b> |
| 1.846348        | 1.748077        | 1.765008        | 5.852995        | 2.310649        | 1.541783        | 1.958053        | Y        |
| 2.531851        | 2.288014        | 2.332733        | 5.140625        | 1.866223        | 1.603432        | 1.640789        | F        |
| 0.120722        | 0.146854        | 0.130476        | 0.101767        | 0.143357        | 0.133236        | 0.140045        | M        |
| 1.315613        | 1.333647        | 1.967622        | 2.583194        | 2.174469        | 1.227648        | 1.250835        | N        |
| 1.115023        | 1.523748        | 1.111526        | 8.180391        | 3.245509        | 1.130481        | 1.567362        | H        |
| 2.733177        | 16.49531        | 28.69449        | 57.56675        | 61.54101        | 3.000569        | 0.161024        | C        |
| 1.900636        | 3.042711        | 1.858678        | 2.790409        | 2.006636        | 1.988969        | 2.082271        | D        |
| 1.881313        | 2.038105        | 2.255625        | 14.37881        | 2.548413        | 1.846532        | 2.670055        | Q        |
| <b>1.391432</b> | <b>1.840091</b> | <b>1.647598</b> | <b>2.429531</b> | <b>1.843404</b> | <b>1.284512</b> | <b>1.862727</b> | <b>R</b> |
| 1.394376        | 2.412049        | 1.706671        | 4.342681        | 1.500008        | 1.342665        | 2.049698        | W        |
| <b>10.53263</b> | <b>16.4747</b>  | <b>20.83504</b> | <b>103.1782</b> | <b>271.3808</b> | <b>11.42756</b> | <b>22.88953</b> | <b>V</b> |
| 3.404509        | 68.59239        | 44.08747        | 62.80657        | 99.23573        | 3.14135         | 14.18852        | S        |
| 5.731169        | 8.996369        | 33.62661        | 30.82792        | 48.41414        | 6.269817        | 11.28751        | I        |
| 5.814717        | 129.0186        | 86.91932        | 121.8301        | 118.1085        | 7.758232        | 18.28387        | A        |
| 1.279543        | 2.064421        | 3.309735        | 7.539055        | 5.168413        | 1.813407        | 1.867879        | L        |
| 1.354995        | 1.51197         | 1.679435        | 1.955292        | 1.906709        | 1.575828        | 2.024487        | E        |
| 1.111526        | 1.176856        | 1.347449        | 2.804211        | 2.330893        | 1.075457        | 1.586133        | P        |
| 1.442224        | 2.069757        | 1.830338        | 7.907662        | 6.010891        | 1.416828        | 2.49026         | K        |
|                 |                 |                 |                 |                 |                 |                 |          |

The intramolecular folding sensor with G521T mutation showed a 95% reduction in RLUC activity in response to the endogenous ER ligand 17 $\beta$ -estradiol (E2) ( $P < 0.05$ ) without significantly affecting the other ligand-induced split RLUC complementation ( $P < 0.05$ ). The complementation induced by the agonist 17 $\beta$ -estradiol (100%) was used for comparison.
