# Supplementary material
Source: PubMed Central journal article supplement (PMC1635097)

**a**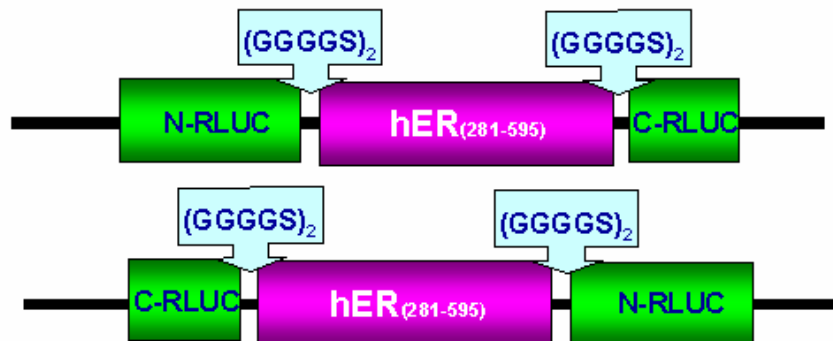**b**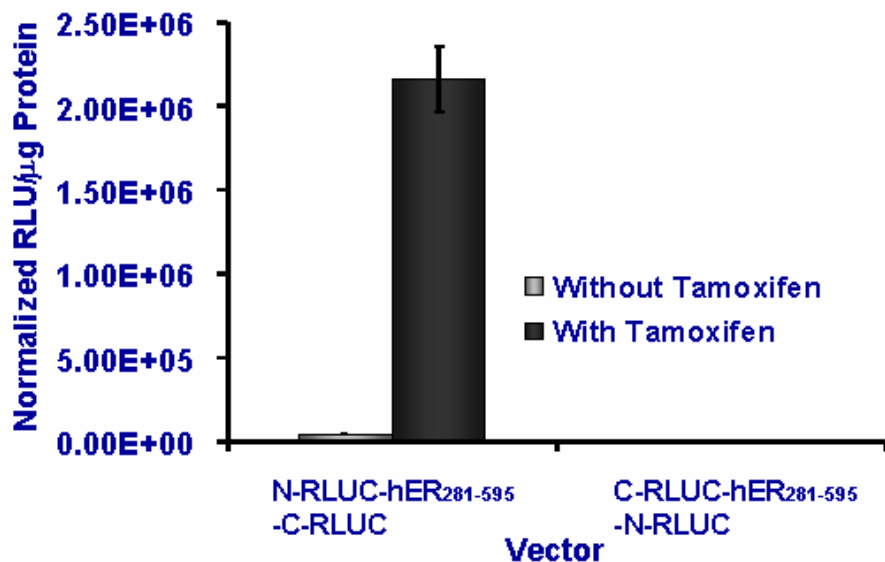

Supplement: pnas_0607385103_1.pdf [file pnas_0607385103_1.pdf]

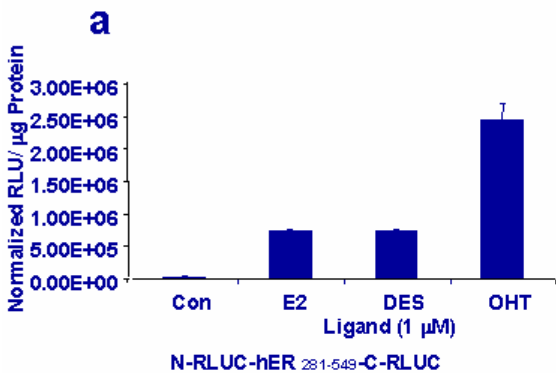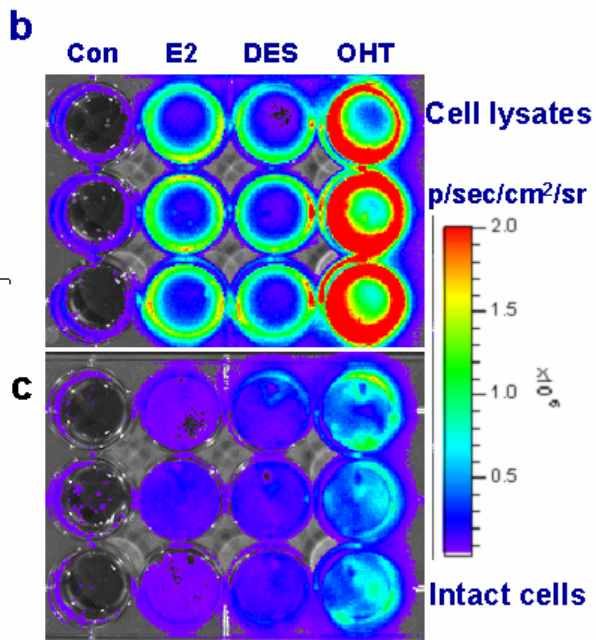

Supplement: pnas_0607385103_3.pdf [file pnas_0607385103_3.pdf]

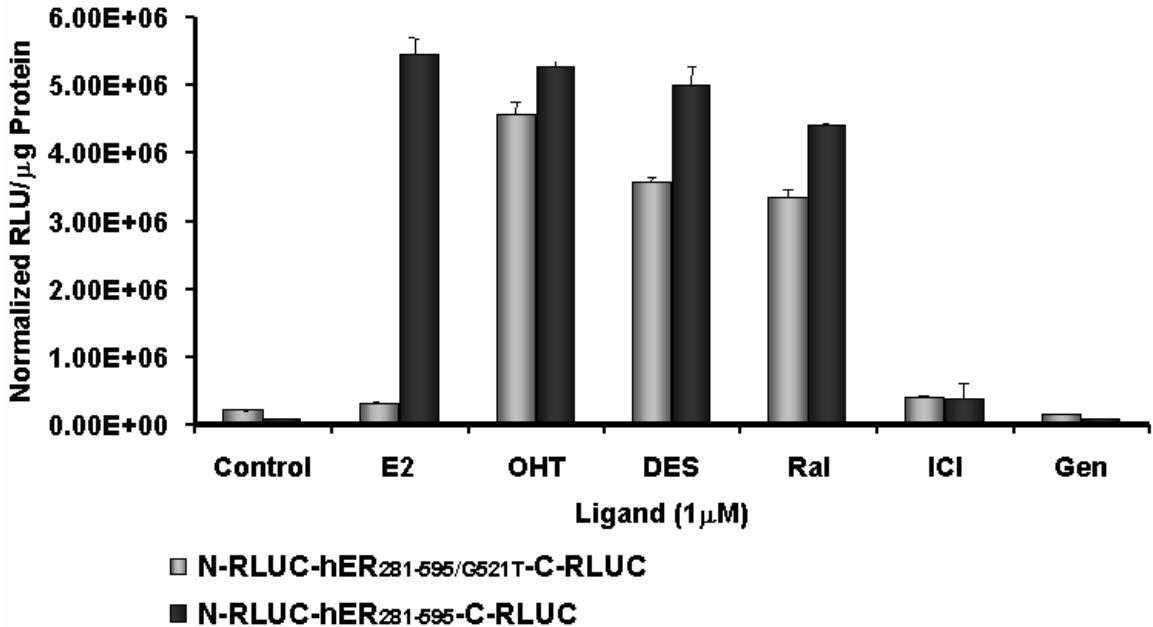

Supplement: pnas_0607385103_4.pdf [file pnas_0607385103_4.pdf]

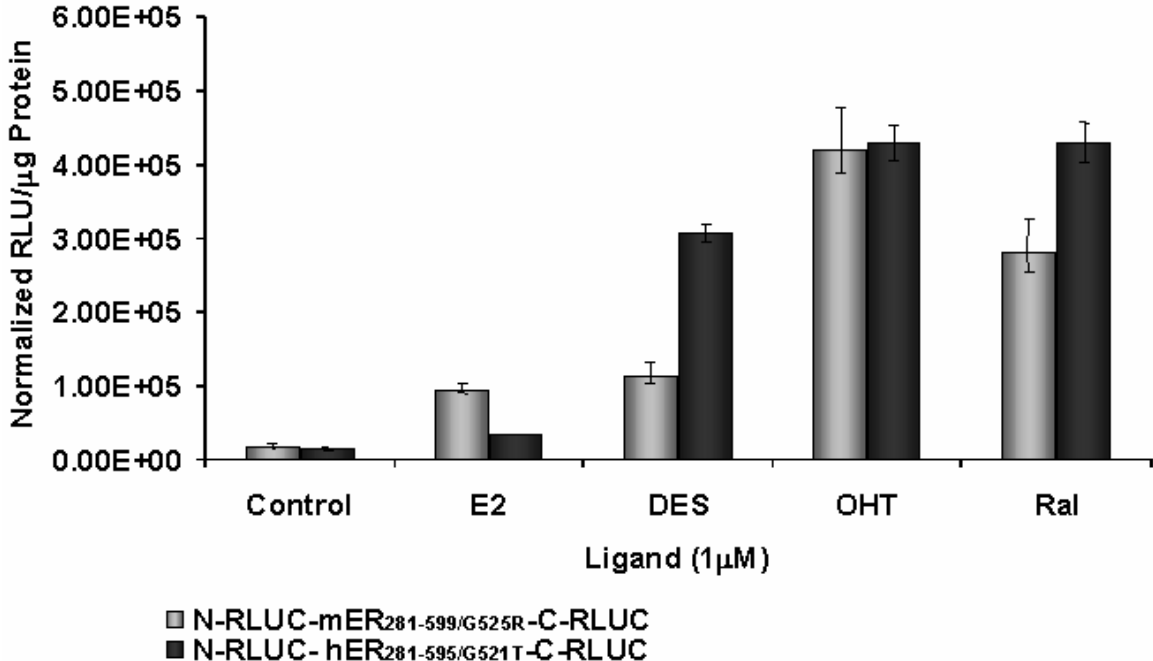

Supplement: pnas_0607385103_5.pdf [file pnas_0607385103_5.pdf]

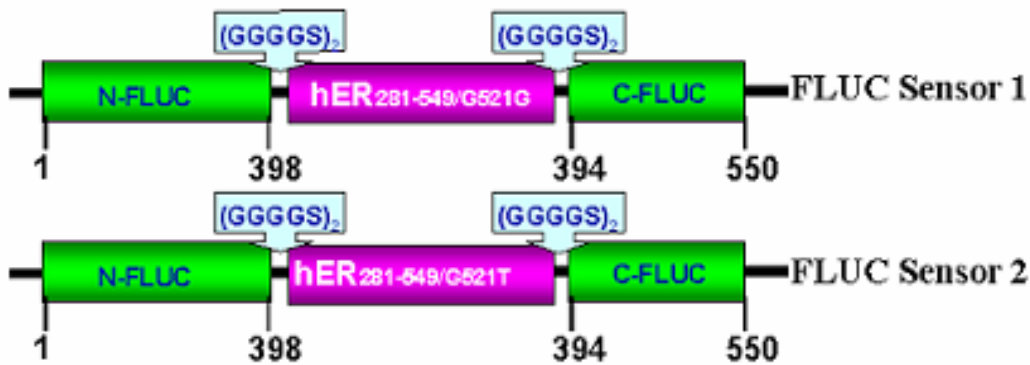

Supplement: pnas_0607385103_6.pdf [file pnas_0607385103_6.pdf]

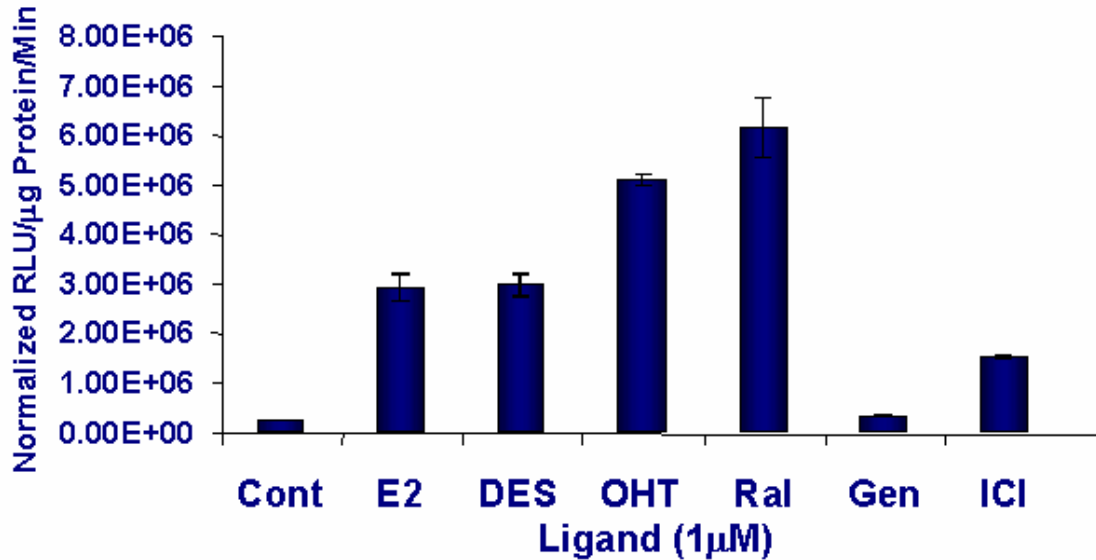

Supplement: pnas_0607385103_7.pdf [file pnas_0607385103_7.pdf]

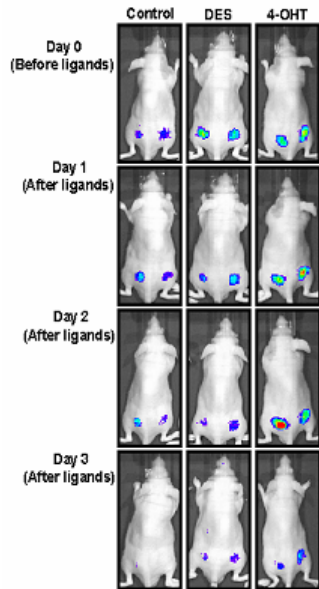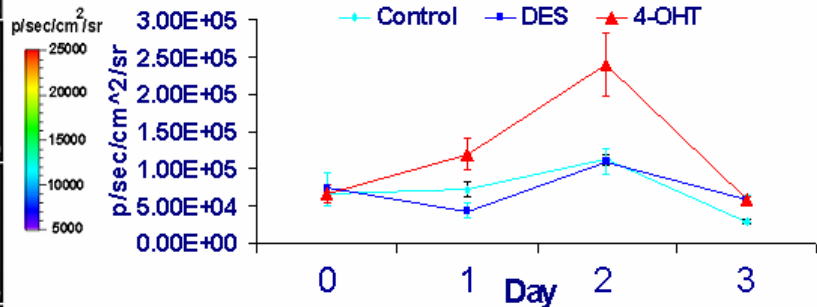

Supplement: pnas_0607385103_8.pdf [file pnas_0607385103_8.pdf]
